# Supplementary material for: Synthesis, crystal structure and properties of sandwich type compounds based on {AsW9} and a hexa-nuclear unit with three supporting TM–triazole complexes
Source: Royal Society of Chemistry journal article supplement (doi:10.1039/c4nj01138d), 2014-10-03
Supplement: c4nj01138d1.pdf [file c4nj01138d1.pdf]

## Supplementary Material

### Synthesis, crystal structure and properties of sandwich type compounds based on {AsW<sub>9</sub>} and hexa-nuclear unit with three supporting M–triazole complexes

Jia-min Liu<sup>1</sup>, Lu Wang<sup>2</sup>, Kai Yu<sup>1,\*</sup>, Zhan-hua Su<sup>1</sup>, Chun-xiao Wang<sup>1</sup>, Chun-mei Wang<sup>1</sup>, Bai-bin Zhou<sup>1,\*</sup>

*1.Key Laboratory of synthesis of functional materials and green catalysis Colleges of Heilongjiang Province, Harbin Normal University, Harbin, 150080, P. R. China*

*2.Department of Biochemical Engineering, Harbin Institute of Technology, Harbin, 150090, P R China*

#### 1. Structural figures

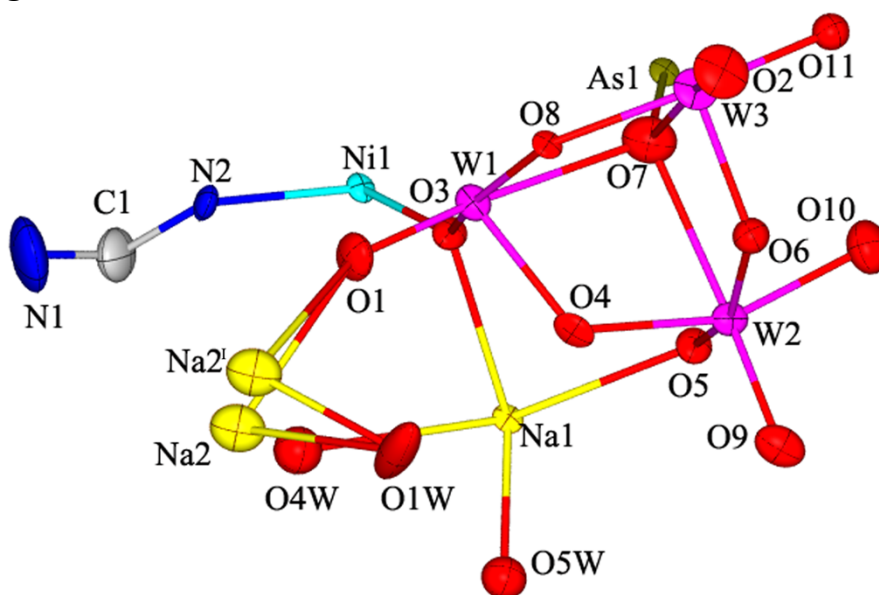

**Figure S1** ORTEP view of the basic units in compound **1** with 50% thermal ellipsoid.

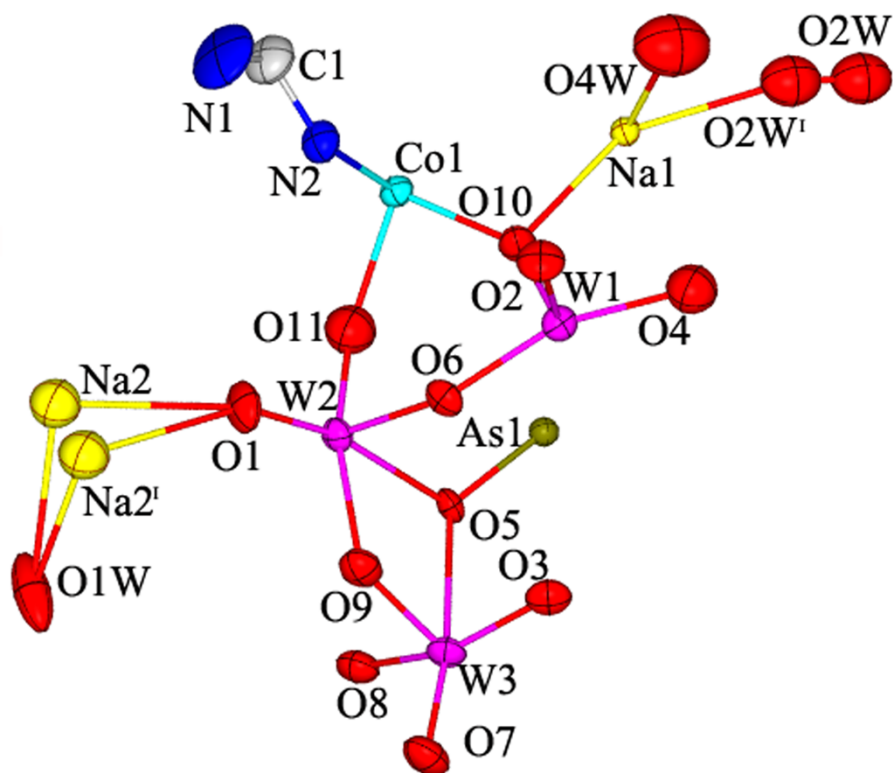

**Figure S2** ORTEP view of the basic units in compound **2** with 50% thermal ellipsoid.

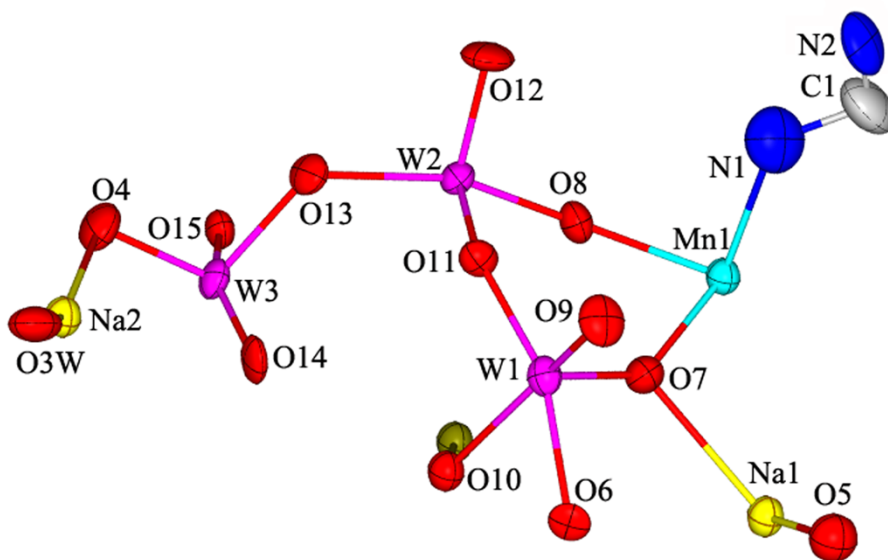

**Figure S3** ORTEP view of the basic units in compound **3** with 50% thermal ellipsoid.

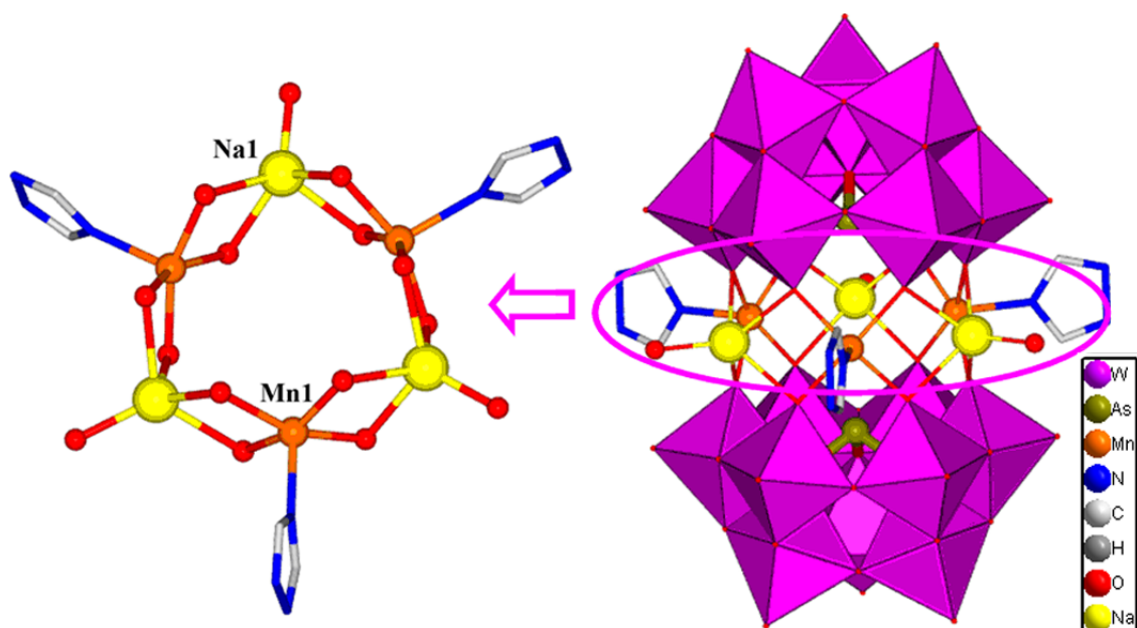

**Figure S4** ORTEP view of the basic units in compound **3** with 50% thermal ellipsoid.

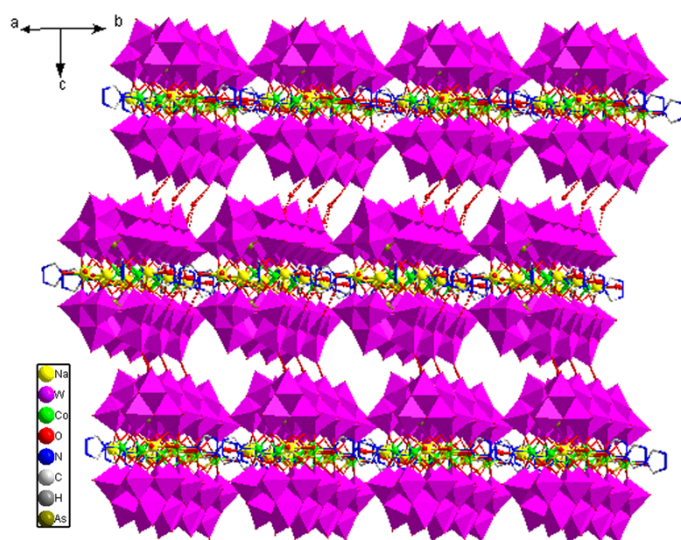

**Figure S4** The packing arrangement of compound **2** viewed along *b* axis.

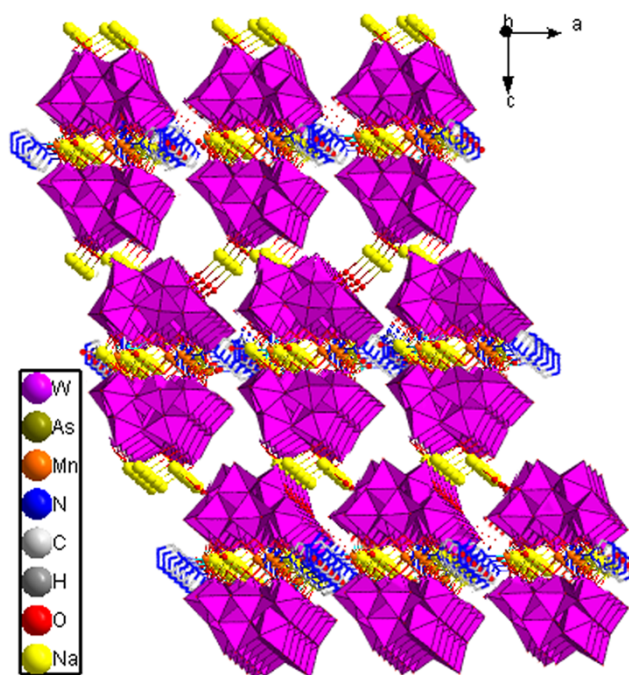

Figure S5 The packing arrangement of compound **3** viewed along *b* axis.

## 2. Structural data

Table S1 Selected bond lengths (Å) and bond angles (°) of compound **1**

|                     |           |                     |           |                   |           |
|---------------------|-----------|---------------------|-----------|-------------------|-----------|
| W(1)-O(1)           | 1.738(11) | W(1)-O(3)           | 1.785(10) | W(1)-O(4)         | 1.950(10) |
| W(1)-O(7)           | 2.311(13) | W(1)-O(8)           | 2.026(8)  | W(1)-O(10)        | 1.928(13) |
| W(2)-O(4)           | 1.945(10) | W(2)-O(5)           | 1.793(10) | W(2)-O(6)         | 2.030(10) |
| W(2)-O(7)           | 2.353(12) | W(2)-O(9)           | 1.722(11) | W(2)-O(10) #1     | 1.925(12) |
| W(3)-O(2)           | 1.927(10) | W(3)-O(2) #1        | 1.906(10) | W(3)-O(6)         | 1.884(10) |
| W(3)-O(7)           | 2.388(12) | W(3)-O(8)           | 1.888(9)  | W(3)-O(11)        | 1.732(11) |
| As(1)-O(7)          | 1.796(12) | As(1)-O(7) #1       | 1.796(12) | As(1)-O(7)#2      | 1.796(12) |
| Ni(1)-O(3)          | 2.008(10) | Ni(1)-O(3)#4        | 2.008(10) | Ni(1)-O(5) #2     | 1.996(10) |
| Ni(1)-O(5) #3       | 1.996(10) | Ni(1)-N(1)          | 2.012(16) | Na(1)-O(5)        | 2.414(11) |
| Na(1)-O(3)          | 2.424(11) | Na(1)-O(3)#4        | 2.424(11) | Na(1)-O(5)#4      | 2.414(11) |
| Na(1)-O(4)          | 2.960(10) | Na(1)-O(4)#4        | 2.960(10) | Na(1)-O(4W)       | 2.77(4)   |
| Na(1)-O(5W)         | 2.18(3)   | Na(2)-O(4)#7        | 2.776(17) | Na(2')-O(4)#7     | 2.795(17) |
| Na(2')-O(5W)#9      | 2.96(2)   |                     |           |                   |           |
| O(1)-W(1)-O(3)      | 103.4(5)  | O(1)-W(1)-O(10)     | 99.6(5)   | O(1)-W(1)-O(4)    | 99.3(5)   |
| O(1)-W(1)-O(8)      | 96.1(5)   | O(1)-W(1)-O(7)      | 167.5(5)  | O(5)-W(2)-O(7)    | 87.7(4)   |
| O(5)-W(2)-O(10)#1   | 91.7(5)   | O(5)-W(2)-O(4)      | 91.9(4)   | O(5)-W(2)-O(6)    | 160.3(4)  |
| O(6)-W(3)-O(8)      | 90.4(4)   | O(6)-W(3)-O(2)#1    | 89.3(4)   | O(6)-W(3)-O(2)    | 158.5(4)  |
| O(6)-W(3)-O(7)      | 74.4(4)   | O(5)#3-Ni(1)-O(5)#2 | 89.0(6)   | O(5)#3-Ni(1)-O(3) | 159.8(4)  |
| O(5)#3-Ni(1)-O(3)#4 | 87.2(4)   | O(5)#3-Ni(1)-N(1)   | 101.6(5)  | O(5W)-Na(1)-O(4)  | 82.6(2)   |
| O(5W)-Na(1)-O(4)#4  | 82.6(2)   | O(5W)-Na(1)-O(5)#4  | 104.7(7)  | O(5W)-Na(1)-O(5)  | 104.7(8)  |
| O(5W)-Na(1)-O(3)#4  | 129.7(6)  | O(5W)-Na(1)-O(3)    | 129.7(6)  | O(5W)-Na(1)-O(4W) | 70.1(11)  |
| O(7)#1-As(1)-O(7)   | 97.6(5)   | O(7)#1-As(1)-O(7)#2 | 97.6(5)   |                   |           |

Symmetry transformations used to generate equivalent atoms: #1 -x+1,-y+1,-z+2 #2 x,y-1,z #3 x,y+1,z

**Table S2 Selected bond lengths (Å) and bond angles (°) of compound 2**

|                     |           |                     |           |                     |           |
|---------------------|-----------|---------------------|-----------|---------------------|-----------|
| As(1)-O(5)#1        | 1.789(9)  | As(1)-O(5)          | 1.789(9)  | As(1)-O(5)#2        | 1.789(9)  |
| W(1)-O(2)           | 1.730(10) | W(1)-O(10)          | 1.789(10) | W(1)-O(6)           | 1.924(10) |
| W(1)-O(4)           | 1.940(14) | W(1)-O(8)#1         | 2.021(11) | W(1)-O(5)#1         | 2.357(9)  |
| W(2)-O(1)           | 1.734(10) | W(2)-O(11)          | 1.785(14) | W(2)-O(6)           | 1.915(10) |
| W(2)-O(4)#2         | 1.953(14) | W(2)-O(9)           | 2.019(11) | W(2)-O(5)           | 2.318(9)  |
| W(3)-O(7)           | 1.725(11) | W(3)-O(8)           | 1.883(11) | W(3)-O(9)           | 1.892(11) |
| W(3)-O(3)#1         | 1.916(11) | W(3)-O(3)           | 1.919(11) | W(3)-O(5)           | 2.389(9)  |
| Co(1)-O(10)         | 2.027(10) | Co(1)-O(10)#3       | 2.027(10) | Co(1)-O(11)#3       | 2.038(14) |
| Co(1)-O(11)         | 2.038(14) | Co(1)-N(1)          | 2.067(18) | Na(1)-O(4W)         | 2.18(3)   |
| Na(1)-O(10)         | 2.362(11) | Na(1)-O(10)#3       | 2.362(11) | Na(1)-O(11)#4       | 2.380(15) |
| Na(1)-O(11)#1       | 2.380(15) | Na(1)-O(2W')        | 2.42(5)   | O(1)-Na(2')         | 2.74(2)   |
| Na(2)-O(1)          | 2.739(18) | W(3)#2-O(3)         | 1.916(11) | W(2)#1-O(4)         | 1.953(14) |
| Na(2)#5-O(4)        | 2.79(2)   | W(1)#2O(5)          | 2.357(9)  | W(1)#2-O(8)         | 2.021(11) |
| Na(2')#5-O(4)       | 2.78(2)   | Na(1)#2-O(11)       | 2.380(15) | Na(2')#6-O(1W)      | 2.28(2)   |
| Na(2')#7-O(1W)      | 2.28(2)   | Na(2')-O(1W)        | 2.28(2)   | Na(2)#7-O(1W)       | 2.68(3)   |
| Na(2)#6-O(1W)       | 2.68(3)   | Na(2)-O(1W)         | 2.68(3)   | Na(2)-O(4)#8        | 2.79(2)   |
| Na(2')-O(4)#8       | 2.78(2)   |                     |           |                     |           |
| O(5)#1-As(1)-O(5)   | 97.5(4)   | O(5)#1-As(1)-O(5)#2 | 97.5(4)   | O(2)-W(1)-O(10)     | 103.9(5)  |
| O(2)-W(1)-O(6)      | 101.1(5)  | O(2)-W(1)-O(4)      | 99.8(6)   | O(2)-W(1)-O(8)#1    | 95.7(5)   |
| O(2)-W(1)-O(5)#1    | 166.7(4)  | O(1)-W(2)-O(11)     | 103.8(6)  | O(1)-W(2)-O(6)      | 100.4(5)  |
| O(1)-W(2)-O(4)#2    | 99.2(6)   | O(1)-W(2)-O(9)      | 96.3(5)   | O(1)-W(2)-O(5)      | 167.6(5)  |
| O(7)-W(3)-O(8)      | 100.7(5)  | O(7)-W(3)-O(9)      | 100.5(5)  | O(7)-W(3)-O(3)#1    | 100.5(5)  |
| O(7)-W(3)-O(3)      | 101.0(5)  | O(7)-W(3)-O(5)      | 171.8(5)  | O(10)-Co(1)-O(10)#3 | 89.2(6)   |
| O(10)-Co(1)-O(11)#3 | 157.4(5)  | O(10)-Co(1)-O(11)   | 86.3(5)   | O(10)-Co(1)-N(1)    | 102.4(5)  |
| O(4W)-Na(1)-O(10)   | 104.7(7)  | O(4W)-Na(1)-O(10)#3 | 104.7(7)  | O(4W)-Na(1)-O(11)#4 | 125.0(7)  |
| O(4W)-Na(1)-O(11)#1 | 125.0(7)  | O(4W)-Na(1)-O(2W')  | 61.0(13)  | O(1W)-Na(2)-O(1)    | 93.8(5)   |
| O(1W)-Na(2)-O(4)#8  | 112.4(7)  | O(1W)-Na(2')-O(1)   | 103.6(7)  | O(1W)-Na(2')-O(4)#8 | 127.6(8)  |

Symmetry transformations used to generate equivalent atoms: #1 -x+1,-y+1,-z+2 #2 x,y-1,z #3 x,y+1,z

**Table S3 Selected bond lengths (Å) and bond angles (°) of compound 3**

|               |           |              |           |               |           |
|---------------|-----------|--------------|-----------|---------------|-----------|
| W(1)-O(9)     | 1.726(16) | W(1)-O(7)    | 1.782(17) | W(1)-O(11)    | 1.929(14) |
| W(1)-O(6)     | 1.954(14) | W(1)-O(15)#1 | 2.006(15) | W(1)-O(10)    | 2.325(15) |
| W(2)-O(12)    | 1.729(16) | W(2)-O(8)    | 1.790(15) | W(2)-O(11)    | 1.906(14) |
| W(2)-O(6)#2   | 1.940(15) | W(2)-O(13)   | 2.008(15) | W(2)-O(10)#2  | 2.315(15) |
| W(3)-O(4)     | 1.720(17) | W(3)-O(15)   | 1.888(16) | W(3)-O(14)#2  | 1.888(17) |
| W(3)-O(13)    | 1.907(17) | W(3)-O(14)   | 1.945(17) | W(3)-O(10)#2  | 2.411(15) |
| As(1)-O(10)#1 | 1.798(16) | As(1)-O(10)  | 1.798(16) | As(1)-O(10)#2 | 1.798(16) |
| Mn(1)-O(7)#3  | 2.098(16) | Mn(1)-O(7)   | 2.098(16) | Mn(1)-O(8)    | 2.100(16) |
| Mn(1)-O(8)#3  | 2.100(16) | Mn(1)-N(1)   | 2.31(3)   | W(2)#1-O(10)  | 2.315(15) |
| W(3)#1-O(10)  | 2.411(15) | W(2)#1-O(6)  | 1.940(14) | Na(1)#2-O(8)  | 2.392(19) |
| W(1)#2-O(15)  | 2.006(15) | W(3)#1-O(14) | 1.888(17) | Na(1)-O(7)    | 2.415(18) |
| Na(2)-O(4)    | 3.00(2)   | O(5)-Na(1)   | 2.21(6)   | Na(1)-O(8)#1  | 2.392(19) |
| Na(1)-O(8)#4  | 2.392(19) | Na(1)-O(7)#3 | 2.415(18) | Na(2)-O(3W)   | 2.88(4)   |

|                     |           |                           |           |                   |           |
|---------------------|-----------|---------------------------|-----------|-------------------|-----------|
| O(9)-W(1)-O(7)      | 103.6(8)  | O(9)-W(1)-O(11)           | 101.4(8)  | O(9)-W(1)-O(6)    | 99.9(8)   |
| O(9)-W(1)-O(15)#1   | 96.1(7)   | O(9)-W(1)-O(10)           | 167.0(7)  | O(12)-W(2)-O(8)   | 103.8(8)  |
| O(12)-W(2)-O(11)    | 100.1(8)  | O(12)-W(2)-O(6)#2         | 99.0(8)   | O(12)-W(2)-O(13)  | 95.4(8)   |
| O(12)-W(2)-O(10)#2  | 167.0(8)  | O(4)-W(3)-O(15)           | 101.5(8)  | O(4)-W(3)-O(14)#2 | 101.2(8)  |
| O(4)-W(3)-O(13)     | 100.4(8)  | O(4)-W(3)-O(14)           | 100.4(8)  | O(4)-W(3)-O(10)#2 | 170.8(8)  |
| O(10)#1-As(1)-O(10) | 98.5(7)   | O(10)#1-As(1)-<br>O(10)#2 | 98.5(7)   | O(7)#3-Mn(1)-O(7) | 89.6(9)   |
| O(7)#3-Mn(1)-O(8)   | 156.6(7)  | O(7)#3-Mn(1)-O(8)#3       | 86.1(6)   | O(7)#3-Mn(1)-N(1) | 104.3(9)  |
| O(5)-Na(1)-O(8)#1   | 121.7(12) | O(5)-Na(1)-O(8)#4         | 121.7(12) | O(5)-Na(1)-O(7)#3 | 110.1(13) |
| O(5)-Na(1)-O(7)     | 110.1(13) | O(3W)-Na(2)-O(4)          | 158.7(8)  |                   |           |

Symmetry transformations used to generate equivalent atoms: #1 -x+1,-y+1,-z+2 #2 x,y-1,z #3 x,y+1,z

Symmetry transformations used to generate equivalent atoms: #1 -x+1,-y+1,-z+2 #2 x,y-1,z #3 x,y+1,z

Table S3: hydrogen bonds lengths (Å) for compound **1-3**

**Table S4** Selected Hydrogen Bond Lengths ( ) and Bond Angles (°) of complexes **1-3**

| D-H...A                    | d(D-H) | d(H...A) | <D-H...A | d(D...A)  | Symmetry          |
|----------------------------|--------|----------|----------|-----------|-------------------|
| <b>1</b> N(2) H(2A)...O(9) | 0.86   | 2.34     | 148.85   | 3.107(16) |                   |
| O(2W)-H(2WA)...O(4W)       | 0.85   | 2.48     | 108.3    | 2.86(3)   |                   |
| O(4W)-H(4WA)...O(1)        | 0.84   | 2.56     | 132.8    | 3.188(16) | [x, y, -z+1/2]    |
| <b>2</b> N2 H2... O2       | 0.86   | 2.32     | 149.08   | 3.090(12) | [-x+y+1, -x, z]   |
| <b>3</b> O3W H3WB... O13   | 0.85   | 1.99     | 2.66(4)  | 134.8     | [-x, -y+1, -z+1]  |
| O3W H3WB... O14            | 0.85   | 1.93     | 2.61(4)  | 136.4     | [-x, -y+1, -z+1]  |
| N2 H2A... O9               | 0.86   | 2.40     | 3.15(4)  | 147.1     | [-y, x-y+1, z]    |
| O2W H2WA... O1W            | 0.85   | 2.39     | 2.59(7)  | 93.9      | [x-1, y-1, z]     |
| O5 H5A... O2W              | 0.85   | 2.61     | 3.28(7)  | 137.0     | [-y, x-y, z]      |
| O3W H3WA... O15            | 0.85   | 2.10     | 2.66(4)  | 122.6     | [y-1, -x+y, -z+1] |
| O1W H1WA... O2W            | 0.85   | 2.05     | 2.59(7)  | 120.4     | [-x+y+1, -x+1, z] |
| O5 H5A... O6               | 0.85   | 3.16     | 3.42(3)  | 100.7     |                   |

### 3. Physical characterization

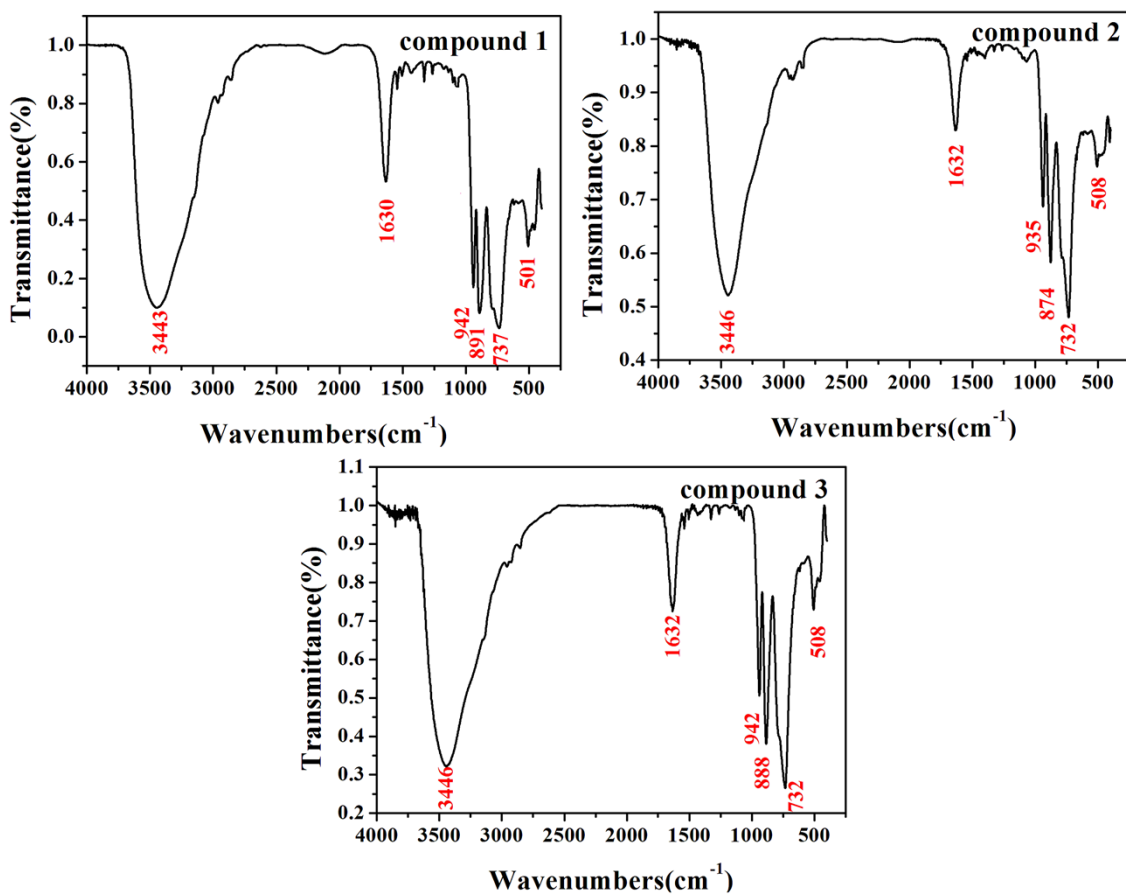

Fig.S6 IR spectras of compounds 1-3

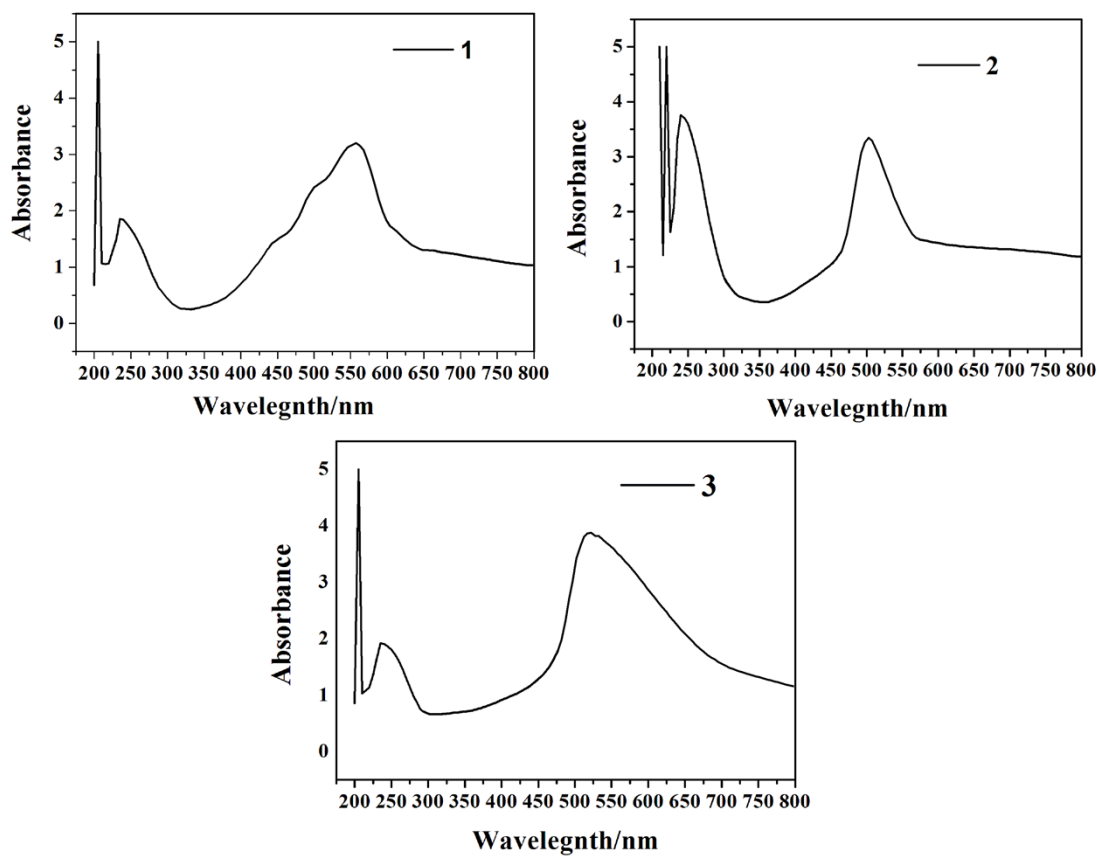

Fig.S7 UV--vis spectras of compounds 1-3

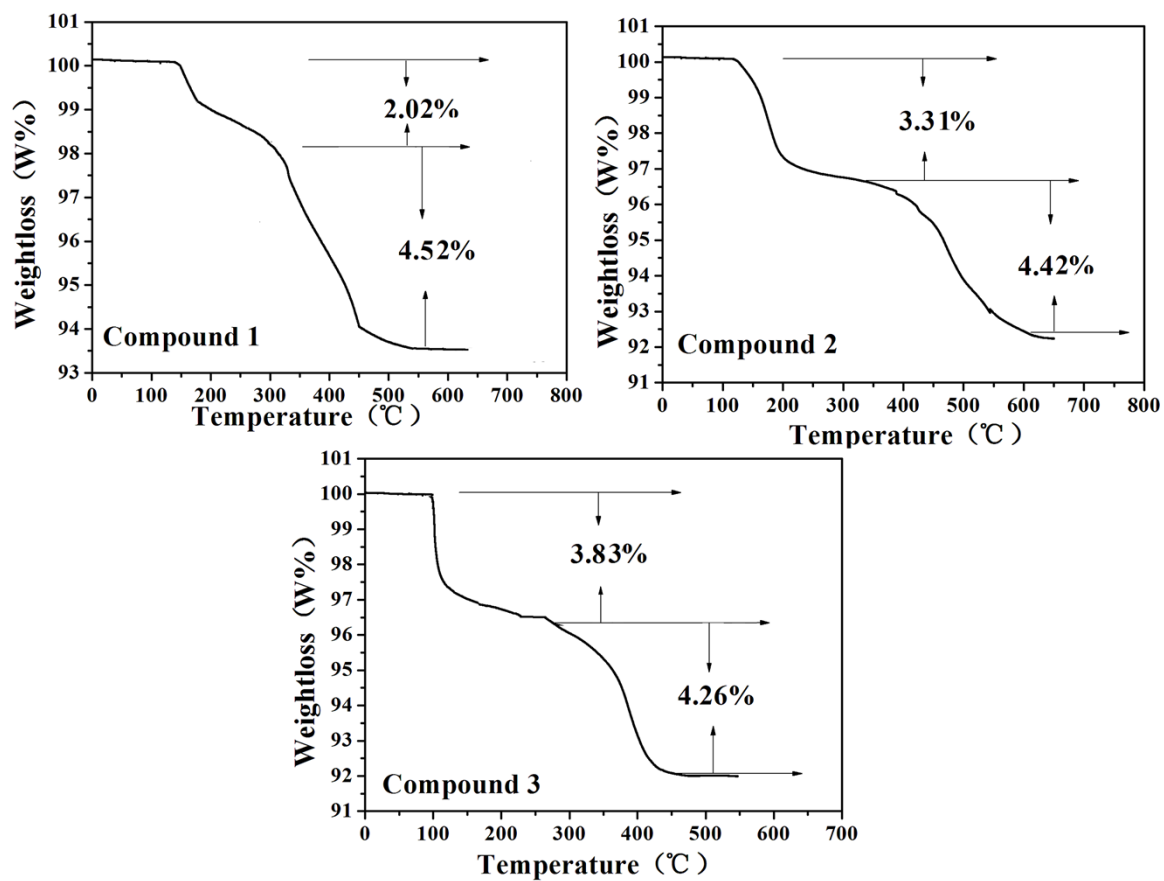

Fig.S8 TG curves of compounds 1-3

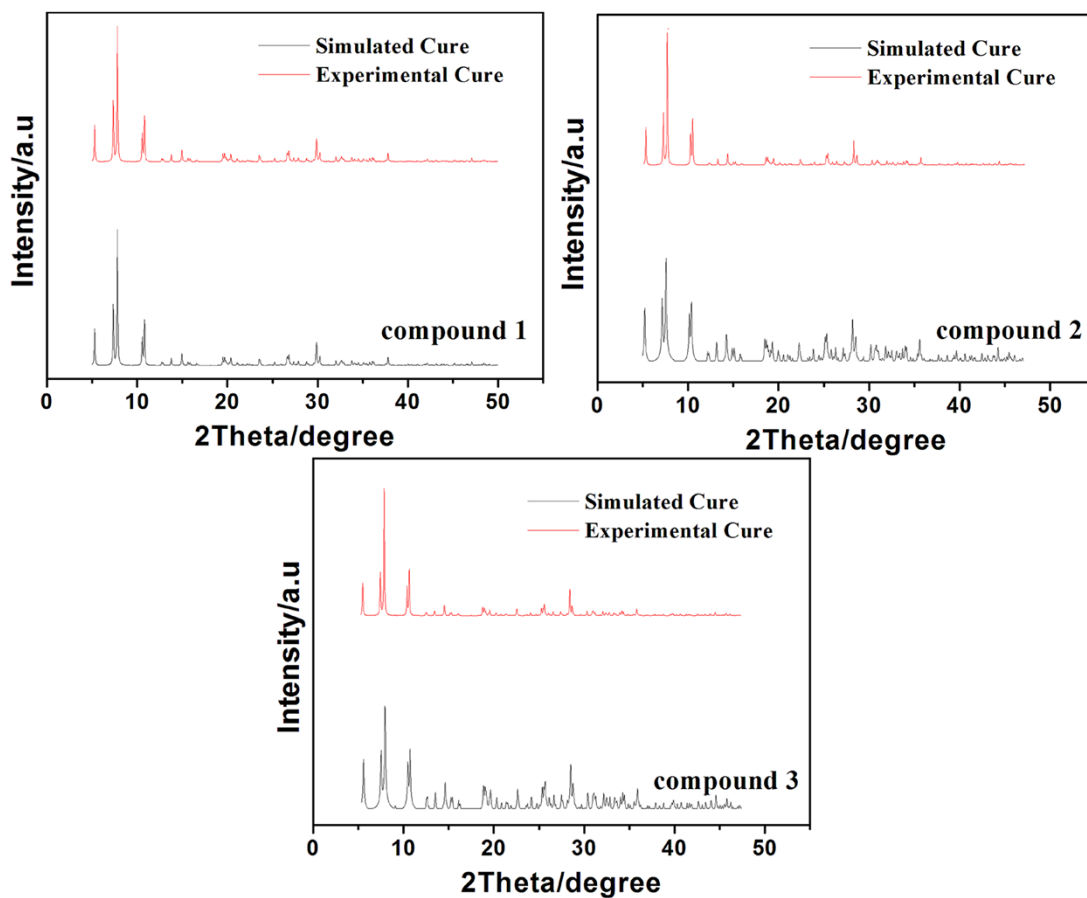

Fig.S9 Simulated and experimental XRD spectras of 1-3



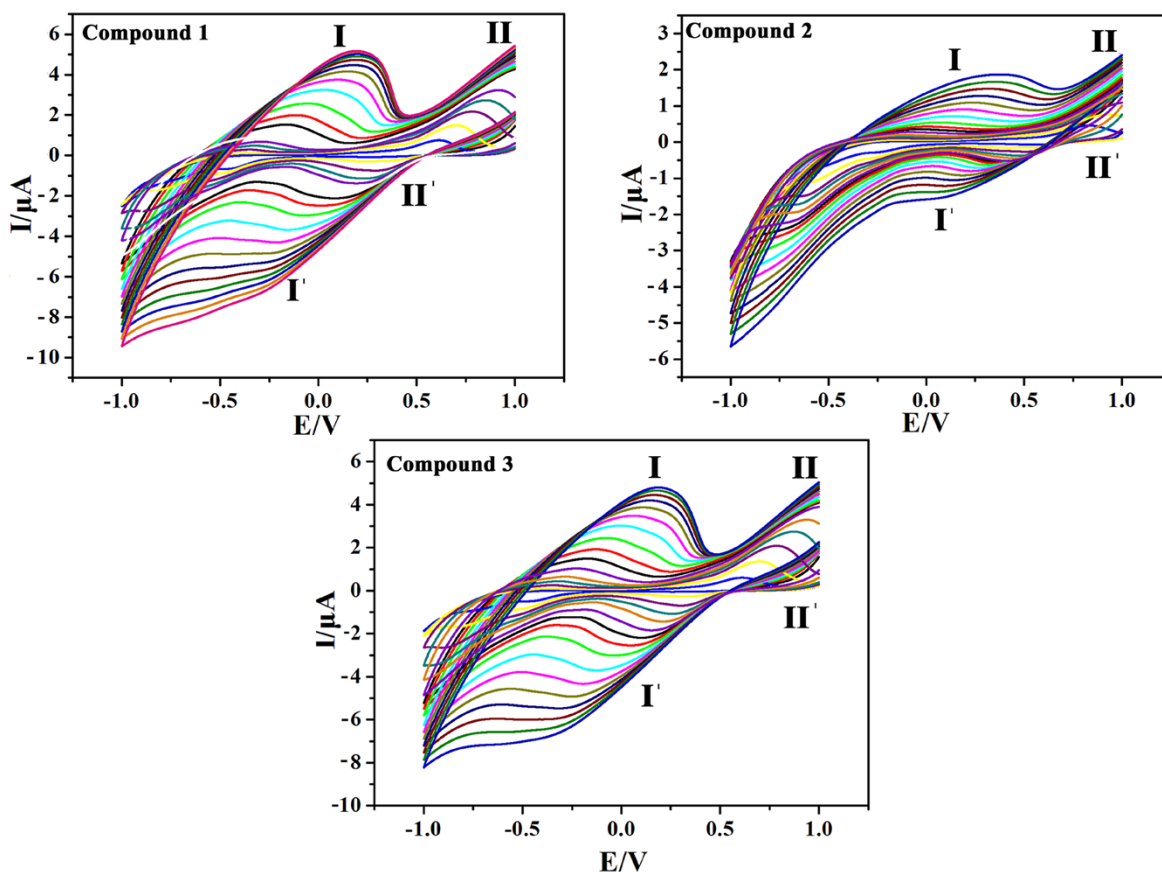

**Fig. S10** Cyclic voltammograms of 1-CPE, 2-CPE, and (c) 3-CPE in the 1.0 M  $\text{H}_2\text{SO}_4$  solution at different scan rates (from inner to outer: 20, 40, 60, 80, 100, 120, 140, 160, 180, 200, 220, 240  $\text{mV s}^{-1}$ ).

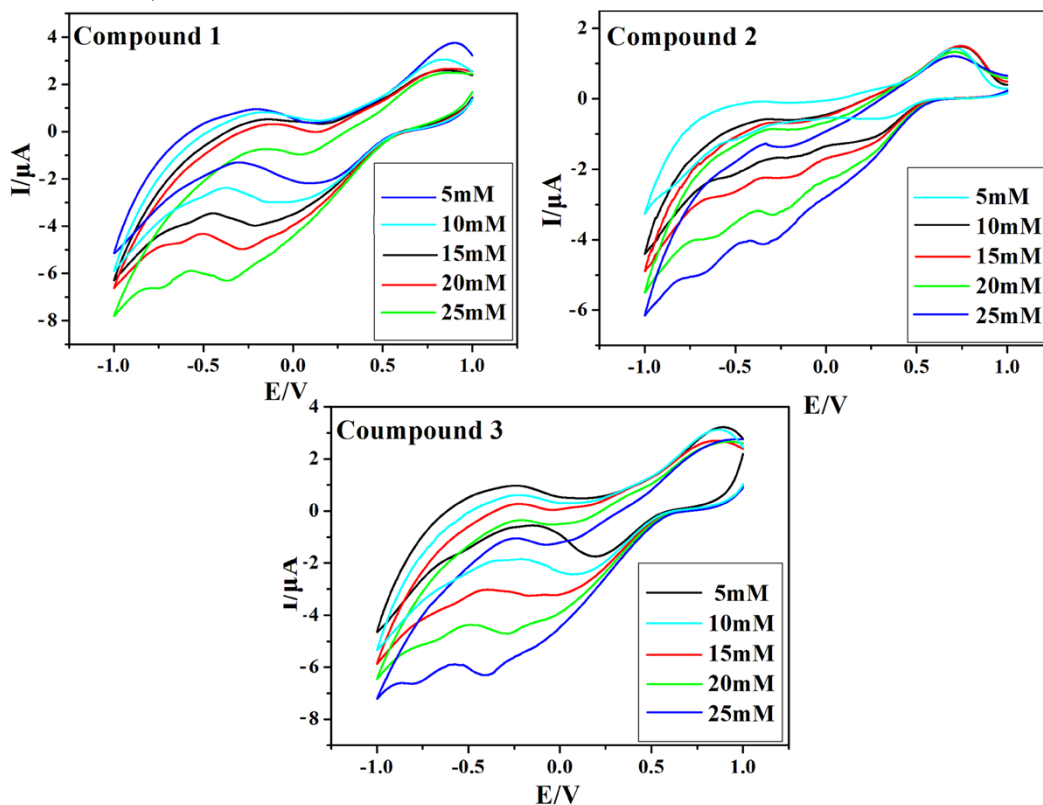

**Fig. S11** Cyclic voltammograms of (a) 1, (b) 2, and (c) 3-CPE in 1 M  $\text{H}_2\text{SO}_4$  solution containing nitrite at different concentrations (Potentials vs. SCE. Scan rate: 40  $\text{mV}\cdot\text{s}^{-1}$ ).
